# Supplementary material for: Inflammatory Bowel Disease Transcriptome and Metatranscriptome Meta-Analysis (IBD TaMMA) framework
Source: Research Square preprint supplement (doi:10.21203/rs.3.rs-478844/v1), 2021-05-10
Supplement: Supplementary file 1 [file c606a5265301ed4bc0195e1d.docx]

Supplementary Information

# Methods

*RNA-Seq data*

FASTQ reads from 3,853 RNA-Seq data (6.5 terabytes, 13 terabasepairs) were mined from NCBI GEO/SRA, using the following search query: “(crohn OR colitis OR ibd) AND expression AND sequencing AND sapiens”.

The software and algorithms used for the analysis and construction of the IBD TaMMA platform are listed below:

## Meta-analysis

The pipelines for RNA-Seq data download and analysis were designed with Snakemake[3](https://sciwheel.com/work/citation?ids=580863&pre=&suf=&sa=0).

FASTQ file download from NCBI SRA and initial QC filtering were performed with fastq-dump (<https://trace.ncbi.nlm.nih.gov/Traces/sra/sra.cgi?view=toolkit_doc&f=fastq-dump>). Additional quality checks and adaptor trimming were performed with FastQC (<https://www.bioinformatics.babraham.ac.uk/projects/fastqc/>) and Trimmomatic[4](https://sciwheel.com/work/citation?ids=63413&pre=&suf=&sa=0).

Read mapping to the human reference genome (GRCh38 primary genome assembly), finalized with GENCODE v35 gene annotations[5](https://sciwheel.com/work/citation?ids=6007664&pre=&suf=&sa=0), and gene quantification were performed with STAR[6](https://sciwheel.com/work/citation?ids=49324&pre=&suf=&sa=0). Post-mapping QC was performed with RSeQC[7](https://sciwheel.com/work/citation?ids=1264160&pre=&suf=&sa=0) and MultiQC[8](https://sciwheel.com/work/citation?ids=2919136&pre=&suf=&sa=0).

Batch effect detection and correction were performed with COMBAT[1](https://sciwheel.com/work/citation?ids=3287371&pre=&suf=&sa=0), within the Surrogate Variable Analysis R package (<https://bioconductor.org/packages/release/bioc/html/sva.html>).

Differential human gene expression and differential species/family/order abundance analyses were performed with DESeq2[9](https://sciwheel.com/work/citation?ids=129353&pre=&suf=&sa=0). Multi-core parallelization was achieved with BiocParallel (<https://github.com/Bioconductor/BiocParallel>). Gene-level annotations were managed by ensembldb[10](https://sciwheel.com/work/citation?ids=8172387&pre=&suf=&sa=0) and EnsDb.Hsapiens.v86 (<http://bioconductor.org/packages/release/data/annotation/html/EnsDb.Hsapiens.v86.html>).

The *statistics* for Human Differential Gene Expression, Shannon diversity, and viral entity relative abundance are shown in **Supplementary Fig. 2**. Comparisons with FDR<1e-10 are considered statistically significant.

Functional enrichment analysis of Gene Ontology biological process was performed with GeneSCF[11](https://sciwheel.com/work/citation?ids=2450702&pre=&suf=&sa=0), using differentially expressed genes with FDR<1e-10.

Taxonomic classification of human genome-unmapped reads by exact k-mer matching against either archaeal, bacterial, eukaryotic, or viral genomes was performed with Kraken2[12](https://sciwheel.com/work/citation?ids=8120680&pre=&suf=&sa=0). Calculation of bacterial species Spearman diversity and Simpson dominance indices were calculated with vegan (<https://github.com/vegandevs/vegan>).

Low-dimensional embedding of high-dimensional data was performed with umap (<https://cran.r-project.org/web/packages/umap/vignettes/umap.html>).

Data carpentry was performed in R with tidyverse (<https://www.tidyverse.org/>), and Python with NumPy (<https://numpy.org/>) and pandas (<https://pandas.pydata.org/>). Plots in the figures were made with ggplot2[13](https://sciwheel.com/work/citation?ids=2805184&pre=&suf=&sa=0).

## Web app design

The web app was developed with Dash (<https://dash.plotly.com/>) and Plotly (<https://plotly.com/>). Code is stored in GitHub at <https://github.com/Humanitas-Danese-s-omics/ibd-meta-analysis>, and running at <https://ibd-meta-analysis.herokuapp.com/>. Data tables used within the web app are also stored in GitHub and can be found at <https://github.com/Humanitas-Danese-s-omics/ibd-meta-analysis-data>. Programmatic access to the data tables is performed by Requests (<https://docs.python-requests.org/>). The complete guide on how to use the TaMMA web app can be found at <https://ibd-tamma.readthedocs.io/>.

*NGS dark matter*

# Human unmapped FASTQ reads that failed to be classified by metatranscriptomics profiling have been considered as *NGS dark matter*.

**Supplementary References**

[1. Stein, C. K. *et al.* Removing batch effects from purified plasma cell gene expression microarrays with modified ComBat. *BMC Bioinformatics* 16, 63 (2015).](https://sciwheel.com/work/bibliography/3287371)

[2. Ungaro, F. *et al.* Metagenomic analysis of intestinal mucosa revealed a specific eukaryotic gut virome signature in early-diagnosed inflammatory bowel disease. *Gut Microbes* 10, 149–158 (2019).](https://sciwheel.com/work/bibliography/5932861)

[3. Köster, J. & Rahmann, S. Snakemake--a scalable bioinformatics workflow engine. *Bioinformatics* 28, 2520–2522 (2012).](https://sciwheel.com/work/bibliography/580863)

[4. Bolger, A. M., Lohse, M. & Usadel, B. Trimmomatic: a flexible trimmer for Illumina sequence data. *Bioinformatics* 30, 2114–2120 (2014).](https://sciwheel.com/work/bibliography/63413)

[5. Frankish, A. *et al.* GENCODE reference annotation for the human and mouse genomes. *Nucleic Acids Res.* 47, D766–D773 (2019).](https://sciwheel.com/work/bibliography/6007664)

[6. Dobin, A. *et al.* STAR: ultrafast universal RNA-seq aligner. *Bioinformatics* 29, 15–21 (2013).](https://sciwheel.com/work/bibliography/49324)

[7. Wang, L., Wang, S. & Li, W. RSeQC: quality control of RNA-seq experiments. *Bioinformatics* 28, 2184–2185 (2012).](https://sciwheel.com/work/bibliography/1264160)

[8. Ewels, P., Magnusson, M., Lundin, S. & Käller, M. MultiQC: summarize analysis results for multiple tools and samples in a single report. *Bioinformatics* 32, 3047–3048 (2016).](https://sciwheel.com/work/bibliography/2919136)

[9. Love, M. I., Huber, W. & Anders, S. Moderated estimation of fold change and  dispersion for RNA-seq data with DESeq2. *Genome Biol.* 15, 550 (2014).](https://sciwheel.com/work/bibliography/129353)

[10. Rainer, J., Gatto, L. & Weichenberger, C. X. ensembldb: an R package to create and use Ensembl-based annotation resources. *Bioinformatics* 35, 3151–3153 (2019).](https://sciwheel.com/work/bibliography/8172387)

[11. Subhash, S. & Kanduri, C. GeneSCF: a real-time based functional enrichment tool with support for multiple organisms. *BMC Bioinformatics* 17, 365 (2016).](https://sciwheel.com/work/bibliography/2450702)

[12. Wood, D. E., Lu, J. & Langmead, B. Improved metagenomic analysis with Kraken 2. *Genome Biol.* 20, 257 (2019).](https://sciwheel.com/work/bibliography/8120680)

[13. Wickham, H. ggplot2. *WIREs Comp Stat* 3, 180–185 (2011).](https://sciwheel.com/work/bibliography/2805184)

#

# Supplementary Figure Legend

**Supplementary Figure 1. IBD TaMMA is a reliable tool for IBD studies**. (**a**) Schematic representation of the entire IBD TaMMA workflow. This image has been designed using resources from <https://streamlineicons.com>. (**b**) Box plots showing comparable gene expression levels of the housekeeping Actin-beta(*ACTB*), Glyceraldehyde 3-phosphate dehydrogenase (*GAPDH*), Glucose-6-Phosphate Isomerase (*GPI*), and Vacuolar protein sorting-associated protein 29 (*VPS29*) among ileum, colon, and rectum from CD, UC and healthy human subjects (Housekeeping from Eisenberg and Levanon, 2013). (**c**) Box plots showing normalized expression levels of Interferon-gamma (*IFNG*), Interleukin 12B (*IL12B*), Integrin alpha 4 (*ITGA4*), Integrin beta 7 (*ITGB7*), in the ileum, colon, and rectum from CD, UC, and healthy human subjects. Their differential expression between IBD- and healthy-derived samples represent one of the hallmarks of chronic inflammation (literature table within TaMMA web app <https://ibd-meta-analysis.herokuapp.com/>). (**d,e**) Box plots showing the results of metatranscriptomics performed on CD, UC, and healthy ileum, colon, and rectum highlighting the increased relative abundance of *Herpesviridae* family in CD ileum and UC colon by comparison with the healthy (d), as well as the increased relative abundance of *Hepadnaviridae* family in the ileum from UC patients as compared to the CD and healthy tissues (e). All box plots represent sample distribution with the median, min, max, first, and third quartiles. An interquartile range of 1.5 has been used to define outliers. For the statistics, please refer to **Supplementary Fig. 2**.

**Supplementary Figure 2. Statistics and differential gene expressions and relative abundances of the comparisons mentioned in the manuscript.**
